# Supplementary material
Source: Elsevier journal article supplement (https://www.sciencedirect.com/science/article/pii/S0025775321003638)
Supplement: mmc1 [file S0025775321003638:mmc1.doc]

**Declaration of interests**

The authors declare that they have no known competing financial interests or personal relationships that could have appeared to influence the work reported in this paper.

The authors declare the following financial interests/personal relationships which may be considered as potential competing interests:

Los autores han recibido honorarios de Aguettant Ibérica para la redacción del artículo.
