# Supplementary material
Source: Elsevier journal article supplement (https://www.sciencedirect.com/science/article/pii/S0025775321003638)
Supplement: mmc2 [file S0025775321003638:mmc2.pdf]

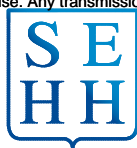

Sociedad Española de  
Hematología y Hemoterapia

Madrid, 2 de Febrero 2021

Muy Sres. Nuestros,

En respuesta a su petición de aval, tenemos el placer de comunicarle que la Sociedad Española de Hematología y Hemoterapia (SEHH) aprueba el patrocinio científico solicitado para:

**Estado actual del Diagnóstico y tratamiento de la Trombocitopenia inducida por Heparina (TIH)**

Les adjuntamos logotipo oficial para incluir en el programa/actividad. También les informamos que las actividades y documentos avalados por la SEHH son publicados en su página web: [www.sehh.es](http://www.sehh.es), para ello solicitamos sean tan amables de remitirnos el programa/documento oficial del curso/proyecto/actividad una vez esté confeccionado.

Quedamos a su disposición para cualquier otra gestión que precisen. Atentamente.

**Dr. Joaquín Sánchez García**

Coordinador del Tribunal de Avaes de la SEHH

Sociedad Española de Hematología y Hemoterapia

Secretaría: [secretariamadrid@sehh.es](mailto:secretariamadrid@sehh.es) • Web: [www.sehh.es](http://www.sehh.es)

Dirección: c/ Fortuny, 51, local 5, 28010 Madrid • Teléfono: +34 913 191 998 • Fax: +34 913 913 383
