# Supplementary material
Source: Elsevier journal article supplement (https://www.sciencedirect.com/science/article/pii/S0025775321003638)
Supplement: mmc3 [file S0025775321003638:mmc3.pdf]

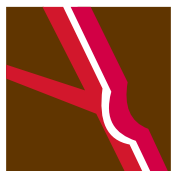

# SETH

Sociedad Española de Trombosis y Hemostasia

## JUNTA DIRECTIVA

### Presidente

Joan Carles Reverter Calatayud

### Vicepresidentas

Pilar Llamas Sillero  
Pilar Medina Badenes

### Secretario

Jorge Cuesta Tovar

### Tesorera

M<sup>a</sup> Eva Mingot Castellano

### Vocales

M<sup>a</sup> Teresa Álvarez Román  
Santiago Bonanad Boix  
José Manuel Calvo Villas  
Jorge Cuesta Tovar  
Olga Gavín Sebastián  
Constantino Martínez Gómez  
Ramiro Núñez Vázquez

### Expresidentes

Justo Aznar Lucea  
Fco. Javier Batlle Fonrodona  
Antonio López Borrasca  
Pascual Marco Vera  
Fernando Martínez Brotons  
José Antonio Páramo Fernández  
Miquel Rutllant Bañeres  
Vicente Vicente García  
Carlos Villaverde Grote

Aguettant Ibérica  
Att. Sr. D. Hugo de Cea

Madrid, 1 de febrero de 2021

Queridos amigos:

Es para mí un placer anunciaros oficialmente que la Junta de la SETH ha acordado conceder el auspicio para la Publicación “Actualización del diagnóstico y tratamiento de la trombocitopenia inducida por heparina (TIH)”.

Os recuerdo que la concesión del auspicio da derecho a hacer constar en la documentación y publicidad de la actividad el texto “con el auspicio de la Sociedad Española de Trombosis y Hemostasia (SETH)” u otro equivalente con o sin la inclusión del logotipo de la Sociedad.

La SETH podrá incluir información de las actividades que auspicia en la página web de la Sociedad. Una vez finalizada la actividad auspiciada deberéis enviar un breve texto de conclusión para su inclusión en la misma.

Cordialmente,

Fdo.: Dr. Jorge Cuesta Tovar  
Secretario SETH/FETH

### Secretaría Científica

Dr. Jorge Cuesta Tovar. ° C/ Castelló, 128 – 1° ° 28006 Madrid ° Email: [secretariacientifica@seth.es](mailto:secretariacientifica@seth.es)

### Secretaría Técnica

Grupo Arán ° C/ Castelló, 128 – 1° ° 28006 Madrid. Tel. 91 782 00 34 ° Fax. 91 561 57 87 ° Email: [secretariatecnica@seth.es](mailto:secretariatecnica@seth.es)
