# Supplementary material
Source: Elsevier journal article supplement (https://www.sciencedirect.com/science/article/pii/S0025775321003638)
Supplement: mmc4 [file S0025775321003638:mmc4.doc]

Estimado Editor,

Los autores desean agradecer a los revisores sus estimulantes comentarios que nos ayudan a mejorar la calidad de nuestro manuscrito. Apreciamos las anotaciones que nos han proporcionado.

A continuación, le contestamos punto por punto a los comentarios realizados:

.-¿Es correcta esta frase de la página 3?.[ En la tabla 1 se muestran los 4 tipos más frecuentes. Las otras cuatro presentaciones menos ¿???inusuales son la TIH persistente, definida como aquella en la que el ascenso de plaquetas no se observa hasta después de al menos una semana desde la retirada de la heparina.]

**RESPUESTA:** Se ha rescrito la frase citando los 4 subtipos menos frecuentes “Las otras cuatro presentaciones más inusuales son: (i) la TIH persistente, definida como aquella en la que el ascenso de plaquetas no se observa hasta después de al menos una semana desde la retirada de la heparina; (ii) la TIH inducida por fondaparinux; (iii) la TIH inducida por exposición solo a la heparina empleada para la anticoagulación de catéteres, y (iv) la TIH asociada a coagulación intravascular diseminada (CID).”

.- Las figuras (en especial la figura 1) han de ser propiedad de los autores o disponer del permiso de los propietarios para su reproducción en Med Clin.

**RESPUESTA:** La figura es original creada por los autores y, por lo tanto, de su propiedad.

Muchas gracias, esperamos que tras los cambios realizados consideren este manuscrito para su publicación en Medicina Clínica.
